# Supplementary material
Source: publisher site journal article supplement (https://www.dovepress.com/article/378099)
Supplement: Supplementary file 1 [file get_supplementary_file.php]

Supplementary Table1: The tolerance and VIF for the training cohort

| clinical characteristics | Tolerance | VIF |
| --- | --- | --- |
| NLR | 0.306 | 3.269 |
| SIRI | 0.2 | 5.007 |
| CNLC stage | 0.879 | 1.138 |
| Microvascular invasion | 0.854 | 1.171 |
| ANRI | 0.742 | 1.347 |
| PLR | 0.085 | 11.733 |
| SII | 0.35 | 2.858 |
| AFP | 0.876 | 1.142 |
| MLR | 0.333 | 3.001 |
| GPR | 0.818 | 1.222 |

Abbreviations: VIF：variance inflation factor; CNLC: the China liver cancer staging system; AFP: alpha-fetoprotein; PLR, platelet-to-lymphocyte ratio; NLR, neutrophil-to-lymphocyte ratio; SIRI: systemic inflammation response index; GPR: γ-glutamyl transpeptidase-to-platelet ratio; SII: systemic immune-inflammatory index; MLR: monocyte-to-lymphocyte ratio; ANRI: aspartate aminotransferase to neutrophil ratio index.

Supplementary Table2: Multivariate Cox regression analysis based on AJCC staging system of disease-free survival in the training cohort

| Clinical Characteristics | HR | 95%CI | P |
| --- | --- | --- | --- |
| NLR | 1.27 | 0.98 - 1.65 | 0.07 |
| SII | 1 | 0.99 - 1.01 | 0.95 |
| SIRI | 1.64 | 1.37 – 1.96 | p<0.05 |
| size | 1.04 | 0.97 - 1.1 | 0.26 |
| AJCC.8th stage |  |  |  |
| IA | NE | NE | NE |
| IB | 0.88 | 0.5 - 1.55 | 0.65 |
| II | 1.59 | 0.84 - 3.03 | 0.16 |
| IIIA | 1.97 | 0.8 - 4.87 | 0.14 |
| IIIB | 1.5 | 0.58 - 3.86 | 0.40 |
| AFP |  |  |  |
| <20 | NE | NE | NE |
| ≥20 | 0.98 | 0.7 - 1.38 | 0.91 |
| Microvascular invasion |  |  |  |
| without | NE | NE | NE |
| with | 1.71 | 1.37 – 1.96 | p<0.05 |
| ANRI | 1.02 | 1.01 - 1.03 | p<0.05 |
| MLR | 1.17 | 0.05 - 26.19 | 0.92 |
| GPR | 0.9 | 0.68 - 1.19 | 0.47 |

Abbreviations: AJCC 8th: the American Joint Committee on Cancer (AJCC) 8th edition staging system; AFP: alpha-fetoprotein; NLR, neutrophil-to-lymphocyte ratio; SIRI: systemic inflammation response index; GPR: γ-glutamyl transpeptidase-to-platelet ratio; SII: systemic immune-inflammatory index; MLR: monocyte-to-lymphocyte ratio; ANRI: aspartate aminotransferase to neutrophil ratio index. HR: Hazard ratio; NE: None existed.

Supplementary Table3: Multivariate Cox regression analysis based on BCLC staging system of disease -free survival in the training cohort

| Clinical Characteristics | HR | 95%CI | P |
| --- | --- | --- | --- |
| NLR | 1.28 | 0.99 - 1.65 | 0.06 |
| SII | 1 | 0.99 - 1.01 | 0.93 |
| SIRI | 1.64 | 1.37 - 1.96 | p<0.05 |
| size | 1.03 | 0.97 - 1.1 | 0.32 |
| BCLC |  |  |  |
| 0 | NE | NE | NE |
| A | 0.96 | 0.56 - 1.66 | 0.88 |
| B | 1.82 | 0.94 - 3.53 | 0.09 |
| C | 1.03 | 0.41 - 2.58 | 0.94 |
| AFP |  |  |  |
| <20 | NE | NE | NE |
| ≥20 | 1 | 0.71 - 1.4 | 1.00 |
| Microvascular invasion |  |  |  |
| without | NE | NE | NE |
| with | 1.71 | 1.22 - 2.38 | p<0.05 |
| ANRI | 1.02 | 1.01 - 1.03 | p<0.05 |
| MLR | 1.37 | 0.06 - 31.02 | 0.85 |
| GPR | 0.89 | 0.67 - 1.19 | 0.44 |

Abbreviations: BCLC: the Barcelona Clinic Liver Cancer staging system; AFP: alpha-fetoprotein; NLR, neutrophil-to-lymphocyte ratio; SIRI: systemic inflammation response index; GPR: γ-glutamyl transpeptidase-to-platelet ratio; SII: systemic immune-inflammatory index; MLR: monocyte-to-lymphocyte ratio; ANRI: aspartate aminotransferase to neutrophil ratio index. HR: Hazard ratio; NE: None existed.
